# Supplementary material for: Stable high-rate cycling electrode based on Li3V2(PO4)3/C using polyamide as a novel carbon source
Source: Royal Society of Chemistry journal article supplement (doi:10.1039/c6ra22714g), 2016-01-01
Supplement: c6ra22714g1.pdf [file c6ra22714g1.pdf]

Table 1

| Sample | a/a'   | b/b'   | c/c'   |
|--------|--------|--------|--------|
| 750°C  | 83 mV  | 87 mV  | 124 mV |
| 800°C  | 104 mV | 98 mV  | 146 mV |
| 850°C  | 113 mV | 110 mV | 165 mV |

Table S2

| Reference | Type of materials          | Potential range | Specific rate capacity           | Capacity Retention             |
|-----------|----------------------------|-----------------|----------------------------------|--------------------------------|
| This work | LVP/C                      | 3.0-4.3V        | 118.9 mAh g <sup>-1</sup> at 10C | 95.7% after 100 cycles at 10C  |
| 1         | LVP/polyaniline            | 3.0-4.3V        | 101.5 mAh g <sup>-1</sup> at 10C | 97.1% for each 10 cycles at 5C |
| 2         | LVP/C mesoporous nanowires | 3.0-4.3V        | 117 mAh g <sup>-1</sup> at 10C   | 80.0% after 3000 cycles at 5C  |
| 3         | LVP-Graphene               | 3.0-4.3V        | 113.2 mAh g <sup>-1</sup> at 2C  | 89.5% after 500 cycles at 30C  |
| 4         | LVP/C                      | 3.0-4.3V        | 52 mAh g <sup>-1</sup> at 30C    |                                |
| 5         | LVP/S-doping carbon        | 3.0-4.3V        | 118.5 mAh g <sup>-1</sup> at 10C | 93.76% after 300 cycles at 10C |

1. H. Yan, W. Chen, X. Wu and Y. Li, *Electrochim. Acta*, 2014, 146, 295-300.
2. Q. Wei, Q. An, D. Chen, L. Mai, S. Chen, Y. Zhao, K. M. Hercule, L. Xu, A. Minhas-Khan and Q. Zhang, *Nano Lett.*, 2014, 14, 1042-1048.
3. M. Yang, M. Ren, W. Zhu, W. Liu and C. Zhu, *Electrochim. Acta*, 2015, 182, 1046-1052.
4. Y. Wu, X. Zhao, Z. Song, L. Lin, C. Du and Z. Tang, *J. Power Sources*, 2015, 274, 782-790.
5. C. Wang, Z. Guo, W. Shen, A. Zhang, Q. Xu, H. Liu and Y. Wang, *J. Mater. Chem. A*, 2015, 3, 6064-6072.
